# Supplementary figures and images for: Participant recruitment and attrition in surgical randomised trials with placebo controls versus non-operative controls: a meta-epidemiological study and meta-analysis
Source: HighWire-hosted journal article supplement (doi:10.1136/bmjopen-2023-080258), 2024-04-01

# overall follow-up rate

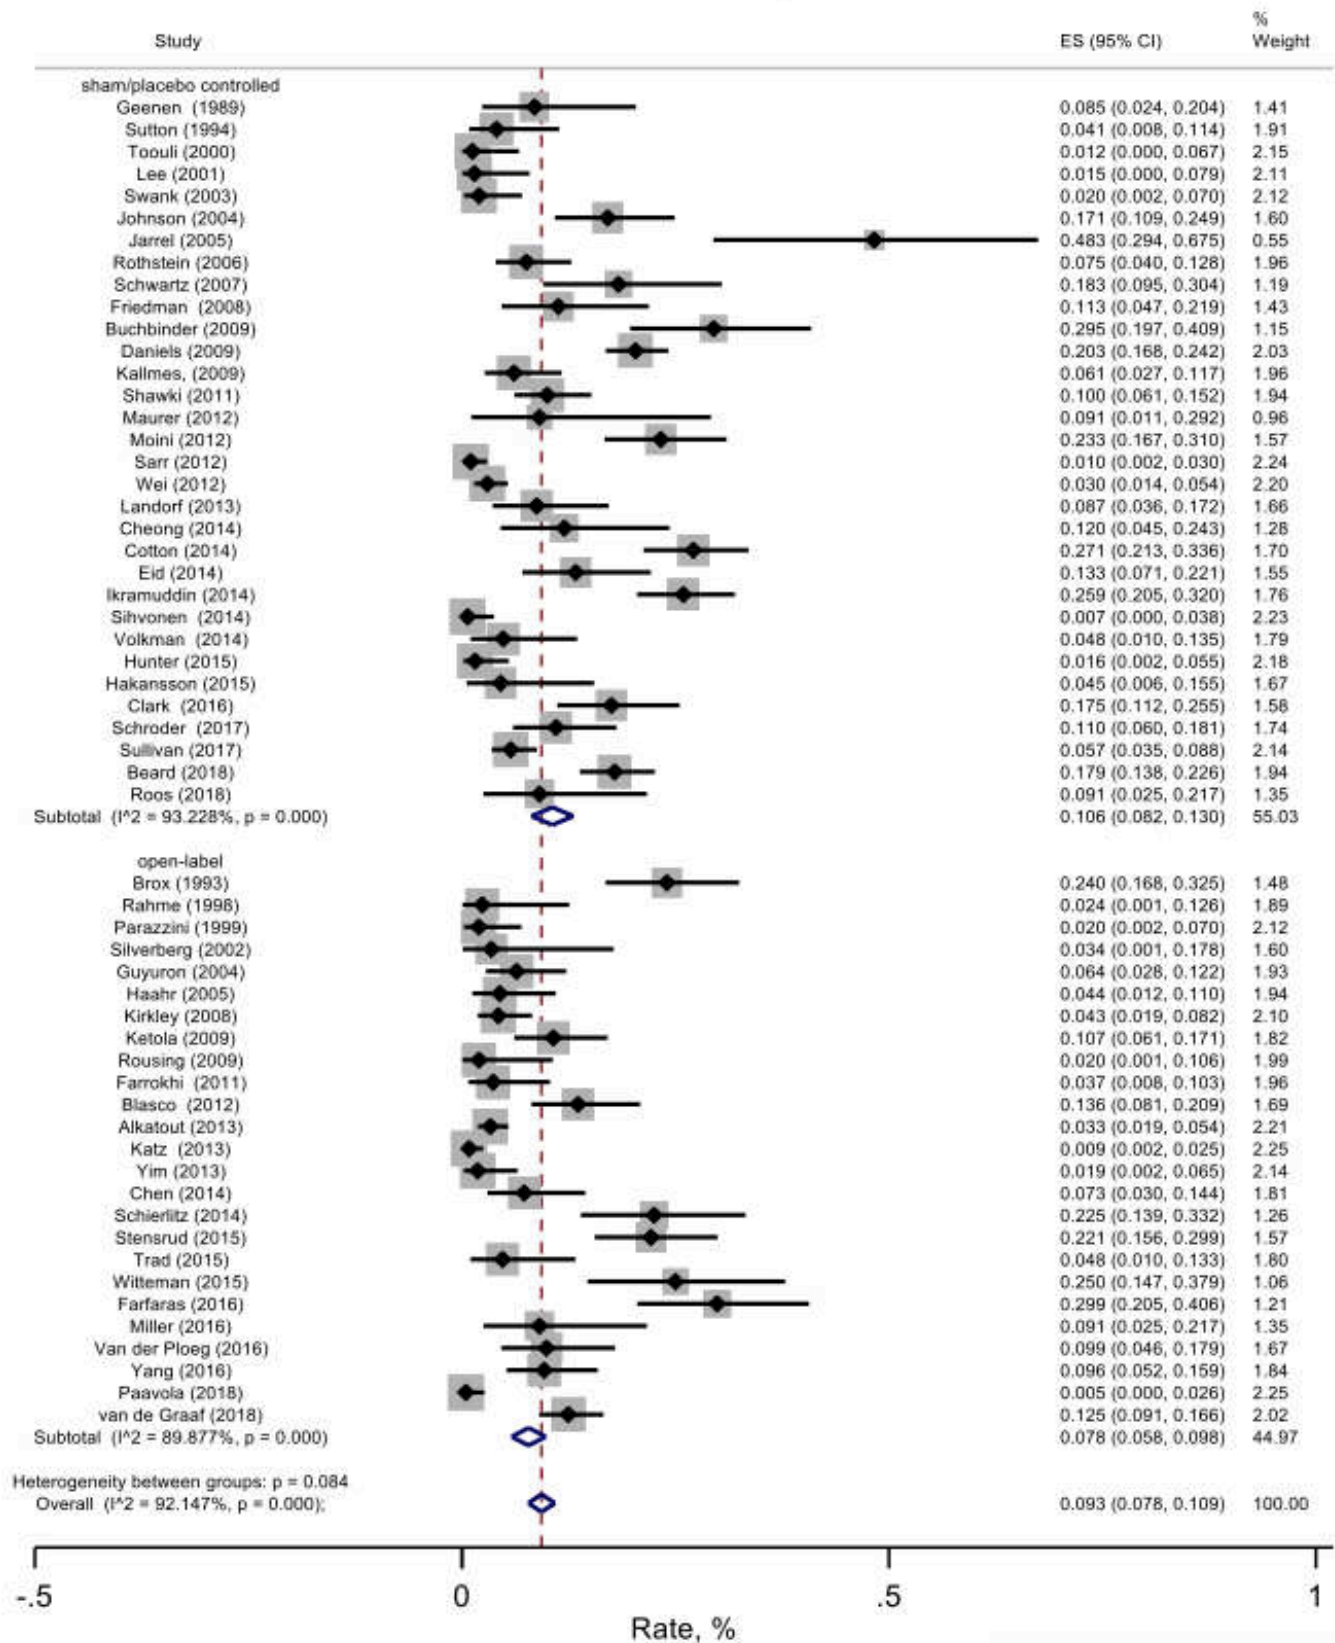

Supplement: bmjopen-2023-080258supp007_data_supplement.pdf [file bmjopen-2023-080258supp007_data_supplement.pdf]

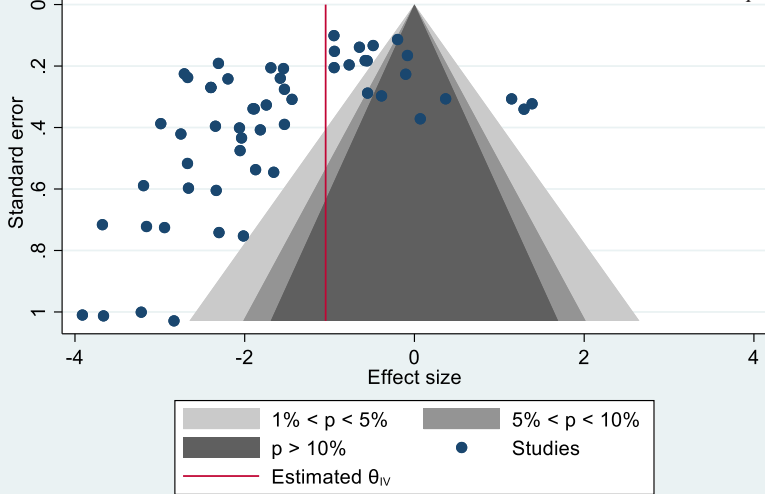

Supplement: bmjopen-2023-080258supp010_data_supplement.pdf [file bmjopen-2023-080258supp010_data_supplement.pdf]
